# Supplementary material for: Enhancing oxygen and hydrogen evolution activities of perovskite oxide LaCoO3via effective doping of platinum
Source: Royal Society of Chemistry journal article supplement (doi:10.1039/c9ra05491j), 2019-01-01
Supplement: c9ra05491j1.pdf [file c9ra05491j1.pdf]

## Supplementary Materials

### **Enhancing oxygen and hydrogen evolution activity of perovskite oxide LaCoO<sub>3</sub> via effectively doping of platinum**

Caiyun Wang, Lirong Zeng, Wei Guo, Cairong Gong\*, Jing Yang\*

Turnover frequency (TOF) refers to the number of catalytic reactions per active site per unit time at a given temperature, pressure, reactant ratio and a certain degree of reaction. The TOF value can reflect the intrinsic activity of the catalyst, which can be said to be the best factor to express the intrinsic activity of the catalyst. The formula is

$$TOF(s^{-1}) = \frac{I(A)}{\alpha F (As\ mol^{-1}) \times N(mol)} \quad (1)$$

Among them, I (A) is the value of catalytic current (given directly by electrochemical workstation), F (As mol<sup>-1</sup>) is Faraday constant, N (mol) is the number of catalytic active sites, and  $\alpha$  is the number of transfer electrons corresponding to the semi-reaction of producing or consuming a molecule target product. In OER,  $\alpha$  is 4, and in HER,  $\alpha$  is 2.

In this paper, we consider that only the B-site metals in the octahedral sites of perovskite material are used as the active sites. Then following Formula (2) was used to calculate the TOF<sub>mass</sub> at OER potential of 1.7 V (vs. RHE) and HER potential of -0.3 V (vs.RHE).

$$TOF_{mass} (\times 10^{-2} s^{-1}) = \frac{current (mA\ cm^{-2}) \times MW\ of\ LaCo_{1-x}Pt_xO_{3-\delta} (g\ mol^{-1})}{\alpha \times F (As\ mol^{-1}) \times catalyst\ loading (mg\ cm^{-2})} \quad (2)$$

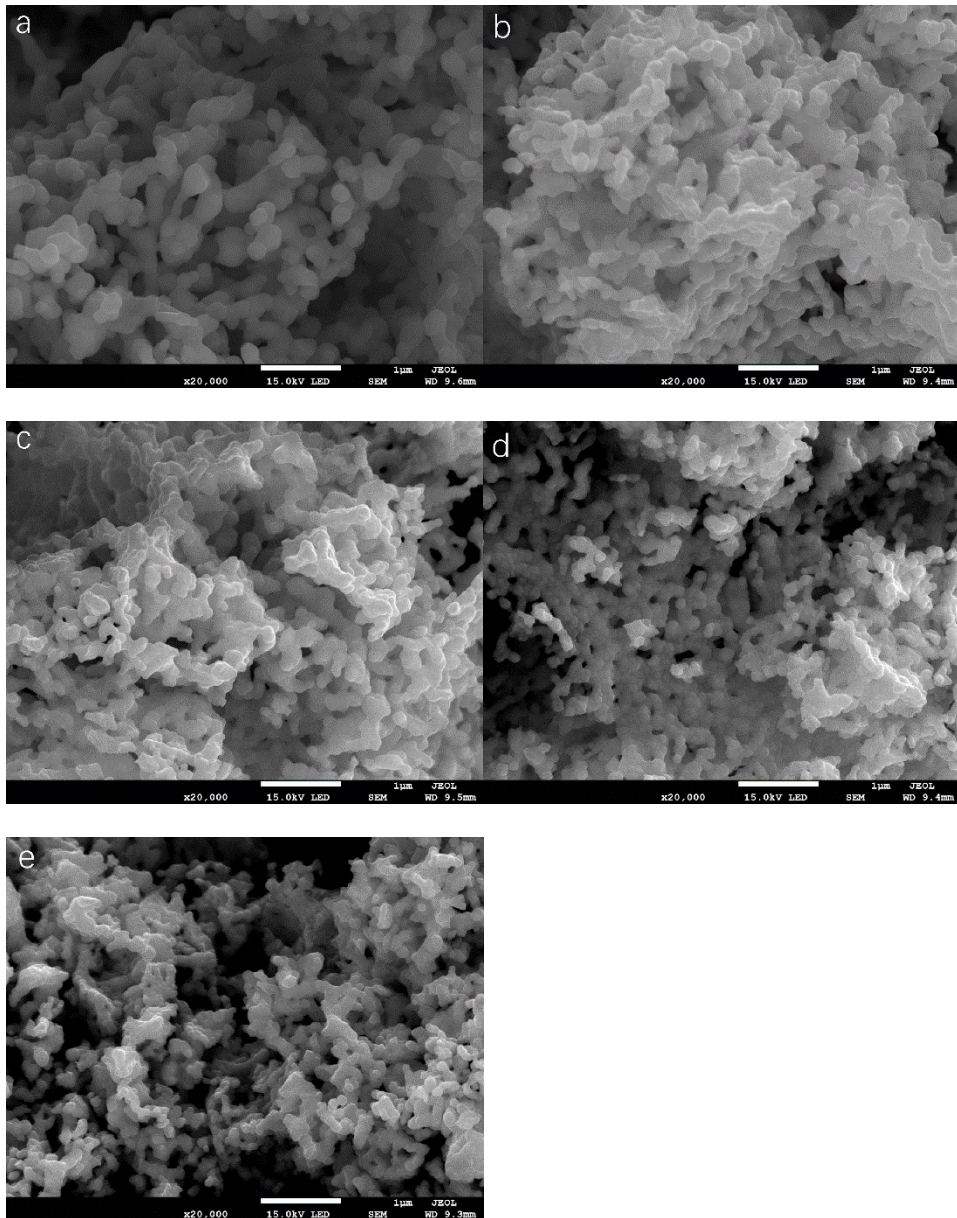

Figure S1. SEM images of a)  $\text{LaCoO}_3$ , b)  $\text{LaCo}_{0.98}\text{Pt}_{0.02}\text{O}_{3-\delta}$ , c)  $\text{LaCo}_{0.96}\text{Pt}_{0.04}\text{O}_{3-\delta}$ , d)  $\text{LaCo}_{0.94}\text{Pt}_{0.06}\text{O}_{3-\delta}$  and e)  $\text{LaCo}_{0.92}\text{Pt}_{0.08}\text{O}_{3-\delta}$  catalysts.

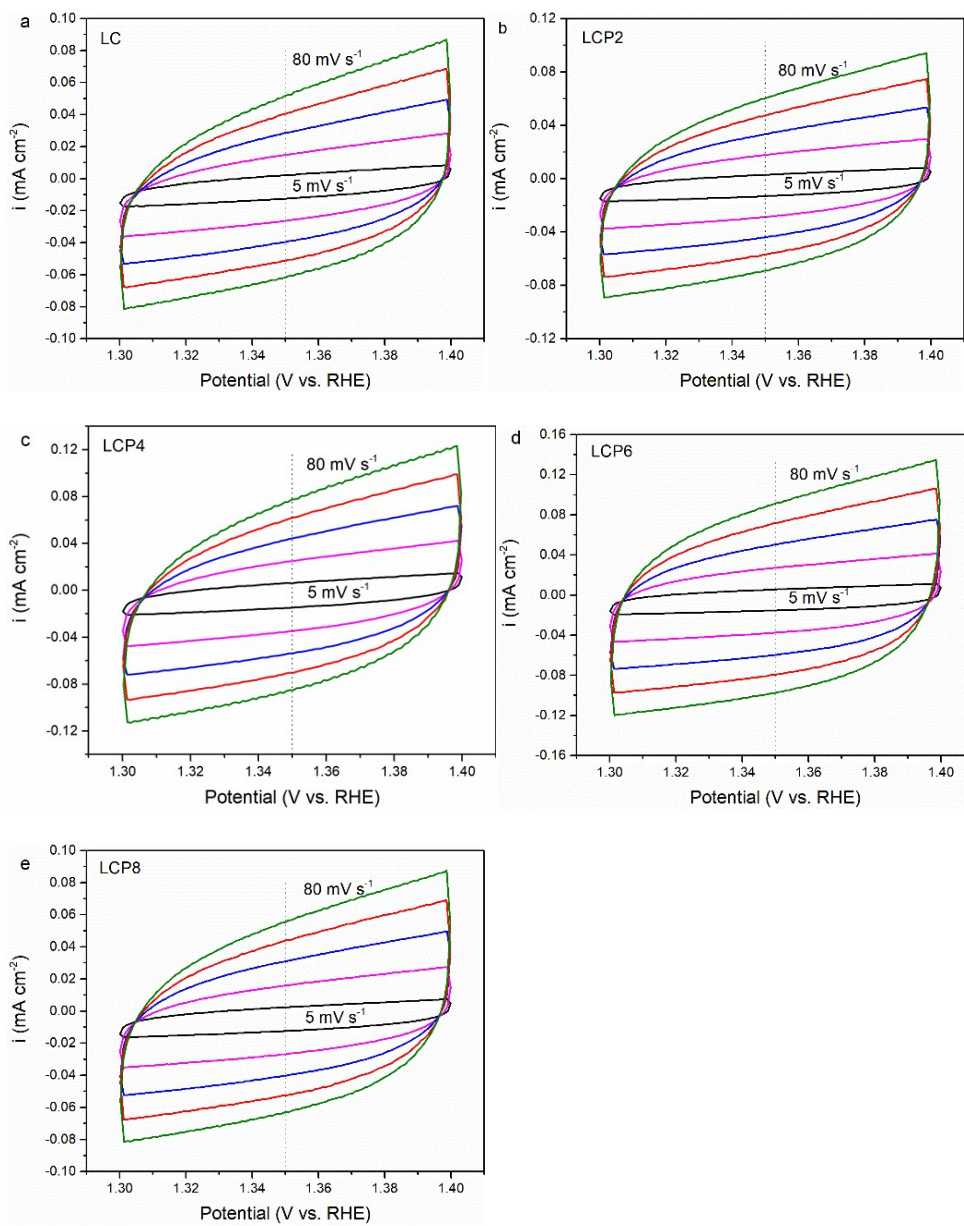

Figure S2. CV measurements in a non-faradic current region (0.3 to 0.4 V vs. Hg/HgCl<sub>2</sub>) at scan rates of 5, 20, 40, 60 and 80 mV s<sup>-1</sup> of a) LaCoO<sub>3</sub>, b) LaCo<sub>0.98</sub>Pt<sub>0.02</sub>O<sub>3-δ</sub>, c) LaCo<sub>0.96</sub>Pt<sub>0.04</sub>O<sub>3-δ</sub>, d) LaCo<sub>0.94</sub>Pt<sub>0.06</sub>O<sub>3-δ</sub> and e) LaCo<sub>0.92</sub>Pt<sub>0.08</sub>O<sub>3-δ</sub> catalysts in 0.1 M KOH solution.

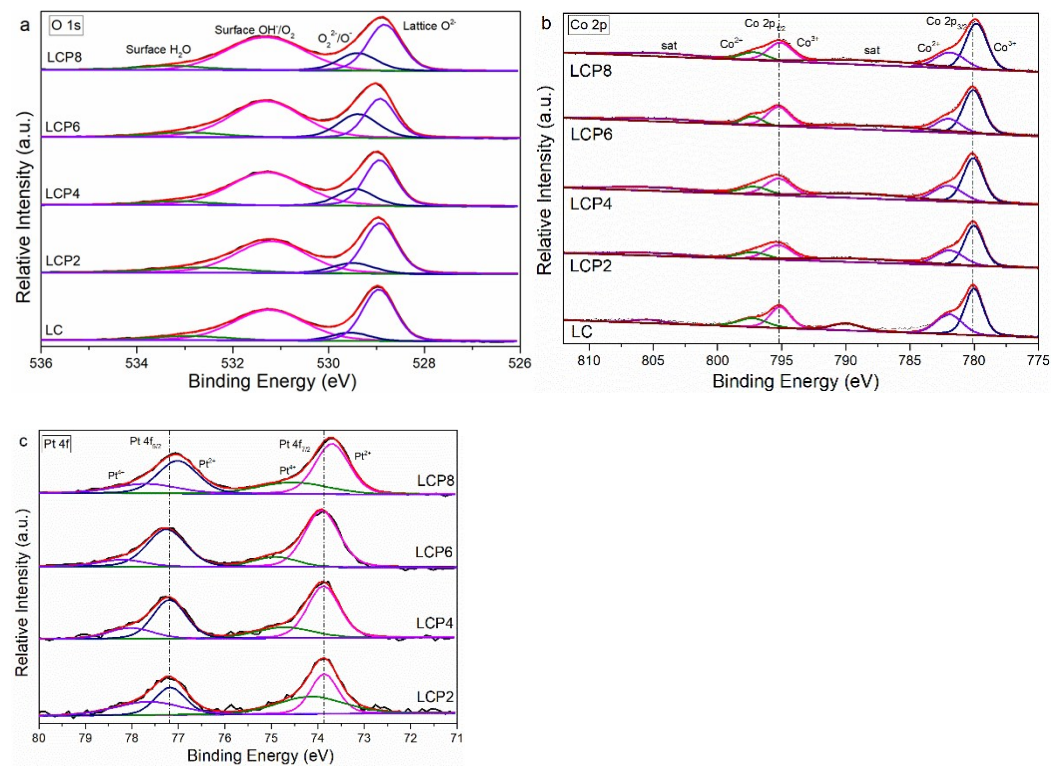

Figure S3. XPS spectra of a) O 1s, b) Co 2p and c) Pt 4f species on the surface of  $\text{LaCo}_{1-x}\text{Pt}_x\text{O}_{3-\delta}$  ( $x = 0, 0.02, 0.04, 0.06, 0.08$ ) powders.

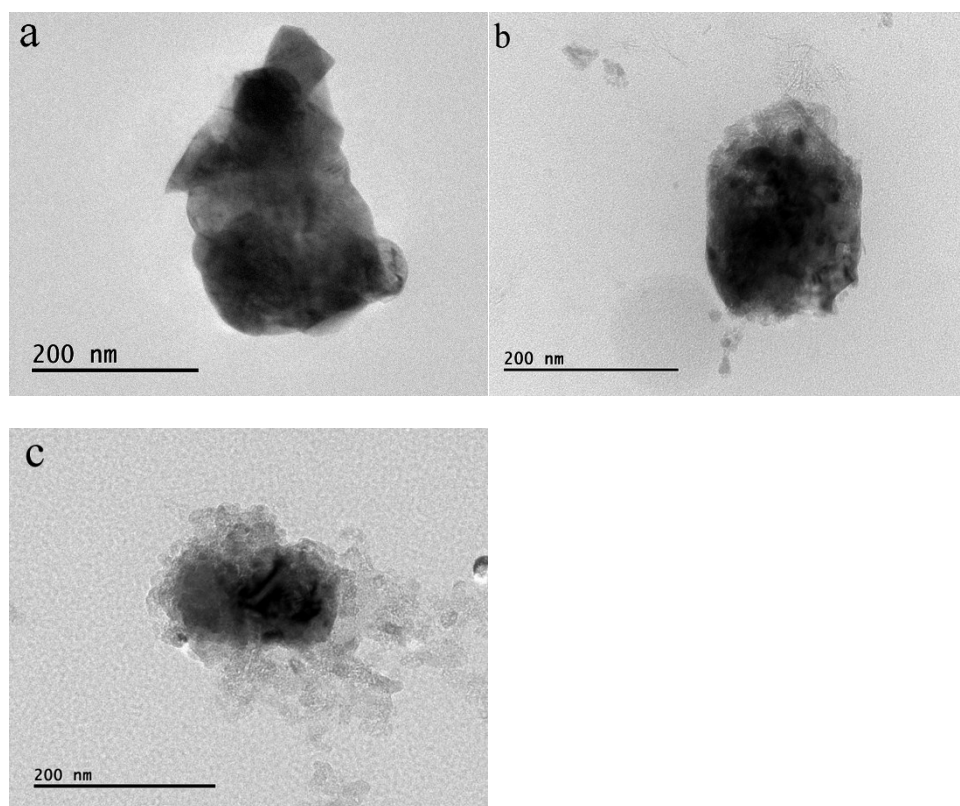

**Figure S4. TEM images of  $\text{LaCo}_{0.94}\text{Pt}_{0.06}\text{O}_{3-\delta}$  a) before the cyclic voltammetry for 500 cycles, b) after the cyclic voltammetry for 500 cycles in OER, C) after the cyclic voltammetry for 500 cycles in HER.**

**Table S1 A summary of perovskite electrocatalysts for OER.**

| Electrocatalysts | Electrolyte | $\eta_{10}$ vs. RHE<br>(mV) | Tafel slope (mV dec <sup>-1</sup> ) | Reference                                            |
|------------------|-------------|-----------------------------|-------------------------------------|------------------------------------------------------|
| STFN/CNT-700     | 0.1 M KOH   | ~480                        | ~98                                 | Electrochim. Acta 2018, 286, 47-54                   |
| C-NSCFNb         | 1.0 M KOH   | ~420                        | ~89                                 | ChemElectroChem 2019, 6, 1520–1524                   |
| SNCF-NR          | 0.1 M KOH   | ~390                        | ~61                                 | Adv. Energy Mater. 2017, 7, 1602122                  |
| L-0.5/rGO        | 1.0 M KOH   | ~285                        | ~80                                 | Adv. Energy Mater. 2017, 7, 1700666                  |
| PBSC@FeOOH-20    | 0.1 M KOH   | ~390                        | ~53                                 | ACS Appl. Mater. Interfaces 2018, 10,<br>38032–38041 |
| 3DOM-LFC82       | 1.0 M KOH   | ~410                        | ~56                                 | Adv. Mater. Interfaces 2019, 6, 1801317              |
| NBM5.5           | 1.0 M KOH   | ~430                        | ~75                                 | ACS Catal. 2018, 8, 364–371                          |
| P-3G             | 0.1 M KOH   | ~320                        | ~74                                 | J. Mater. Chem. A, 2019, 7, 2048–2054                |
| LCP6             | 0.1 M KOH   | 454                         | 86                                  | This work                                            |

**Table S2 A summary of perovskite electrocatalysts for HER.**

| Electrocatalysts | Electrolyte | $\eta_{10}$ vs. RHE<br>(mV) | Tafel slope (mV dec <sup>-1</sup> ) | Reference                                            |
|------------------|-------------|-----------------------------|-------------------------------------|------------------------------------------------------|
| SCFM0.05         | 0.1 M KOH   | ~323                        | ~94                                 | Electrochim. Acta 2019, 312, 128-136                 |
| STFN/CNT-700     | 0.1 M KOH   | ~340                        | ~166                                | Electrochim. Acta 2018, 286, 47-54                   |
| C-NSCFNb         | 1.0 M KOH   | ~470                        | ~133                                | ChemElectroChem 2019, 6, 1520–1524                   |
| SNCF-NR          | 0.1 M KOH   | ~262                        | ~134                                | Adv. Energy Mater. 2017, 7, 1602122                  |
| L-0.5/rGO        | 1.0 M KOH   | ~187( $\eta_{150}$ )        | ~46                                 | Adv. Energy Mater. 2017, 7, 1700666                  |
| PBSC@FeOOH-20    | 0.1 M KOH   | ~280                        | ~70                                 | ACS Appl. Mater. Interfaces 2018, 10,<br>38032–38041 |
| 3DOM-LFC82       | 1.0 M KOH   | ~360                        | ~111                                | Adv. Mater. Interfaces 2019, 6, 1801317              |
| NBM5.5           | 1.0 M KOH   | ~290                        | ~87                                 | ACS Catal. 2018, 8, 364–371                          |
| P-3G             | 0.1 M KOH   | ~230                        | ~124                                | J. Mater. Chem. A, 2019, 7, 2048–2054                |
| LCP6             | 0.1 M KOH   | 294                         | 148                                 | This work                                            |
